# Supplementary material for: Colloidosome like structures: self-assembly of silica microrods
Source: Royal Society of Chemistry journal article supplement (doi:10.1039/c5ra25817k), 2016-01-01
Supplement: c5ra25817k1.pdf [file c5ra25817k1.pdf]

## Electronic Supplementary Information Colloidosome like structures: Self-assembly of silica microrods

P. Datskos,<sup>a</sup> G. Polizos,<sup>a</sup> M. Bhandari,<sup>b</sup> D. A. Cullen<sup>c</sup> and J. Sharma.<sup>a\*</sup>

<sup>a</sup>Nanosystems, Separations, and Materials Research Group; Energy and Transportation Science Division; Oak Ridge National Laboratory, One Bethel Valley Road, Oak Ridge, TN 37831, USA. Email: sharmajk@ornl.gov

<sup>b</sup>Building Envelop Group, Oak Ridge National Laboratory, One Bethel Valley Road, Oak Ridge, TN 37831, USA

<sup>c</sup>Material Science and Technology Division, Oak Ridge National Laboratory, One Bethel Valley Road, Oak Ridge, TN 37831, USA

### Synthesis of silica particles

Silica particles were synthesized by modifying a reported method.<sup>1</sup> Briefly, H<sub>2</sub>O (1.6 mL) and NH<sub>4</sub>OH (2.25 mL) were added to ethanol (11.5 mL), followed by an addition of TEOS (0.50 mL). The reaction mixture was kept stirring overnight. Before using for self-assembly particles were washed 2-3 times with ethanol by centrifugation and supernatant removal.

### MORE SEM images showing self-assembled structures made of rods

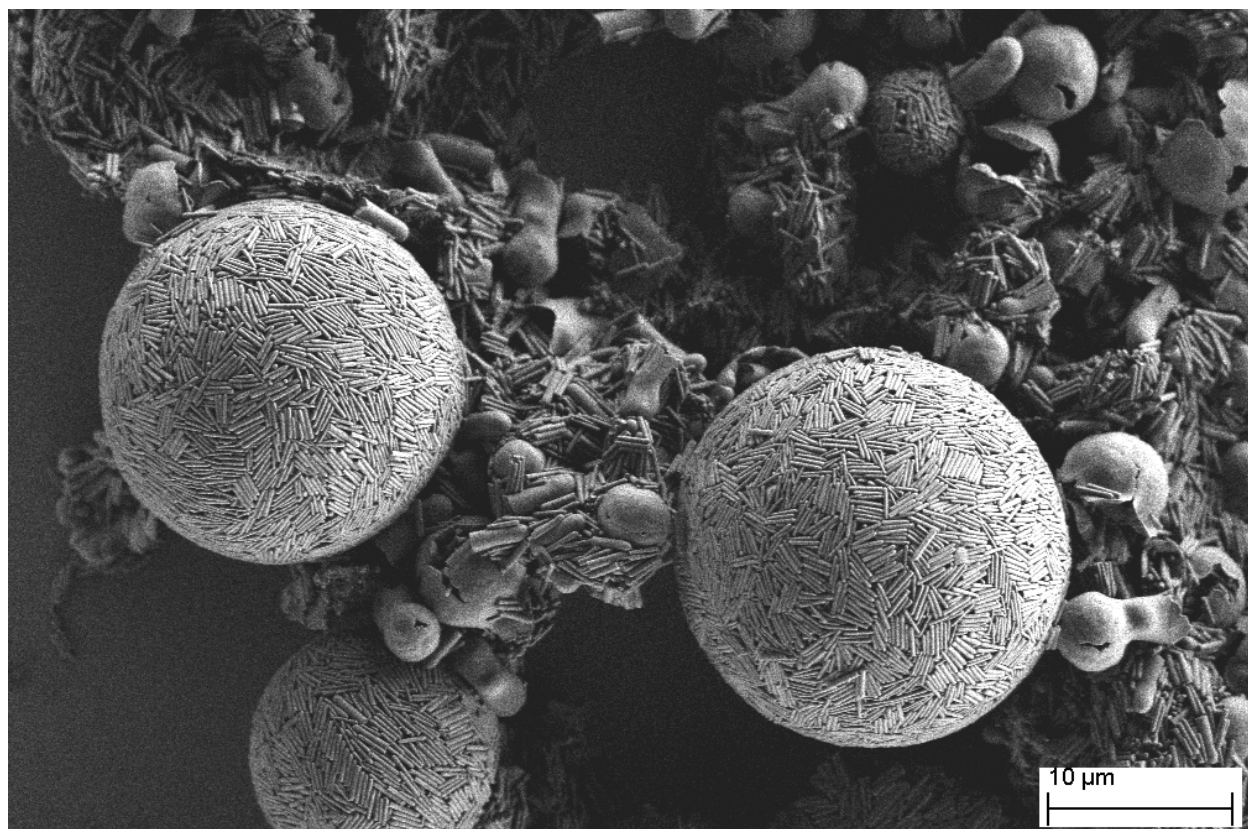

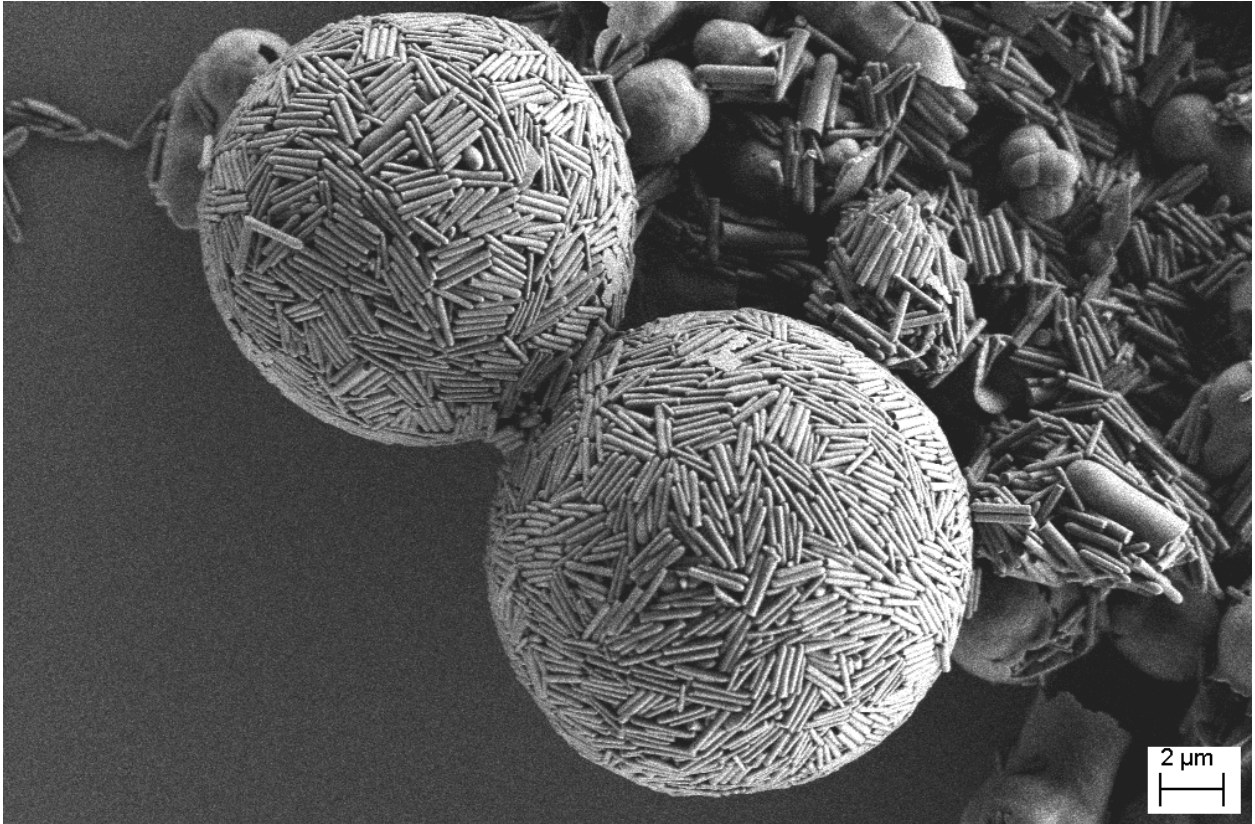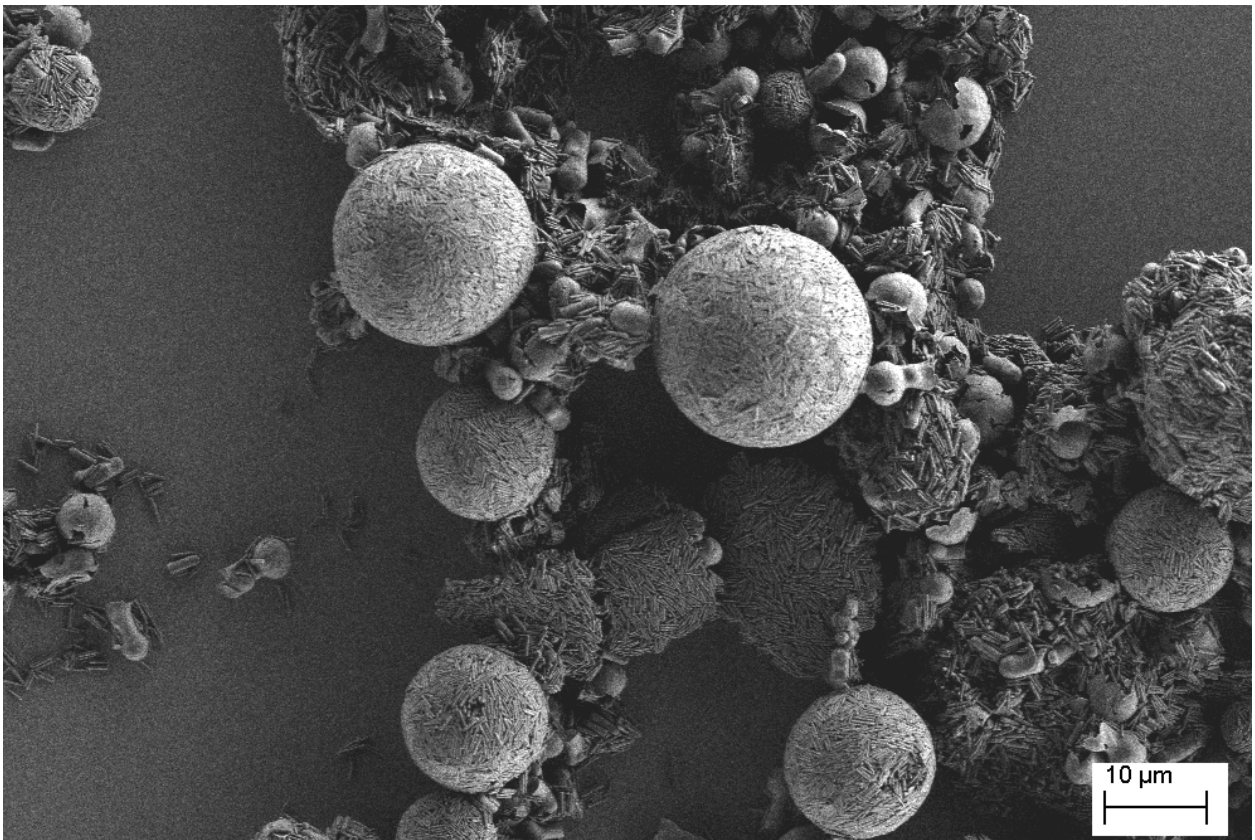

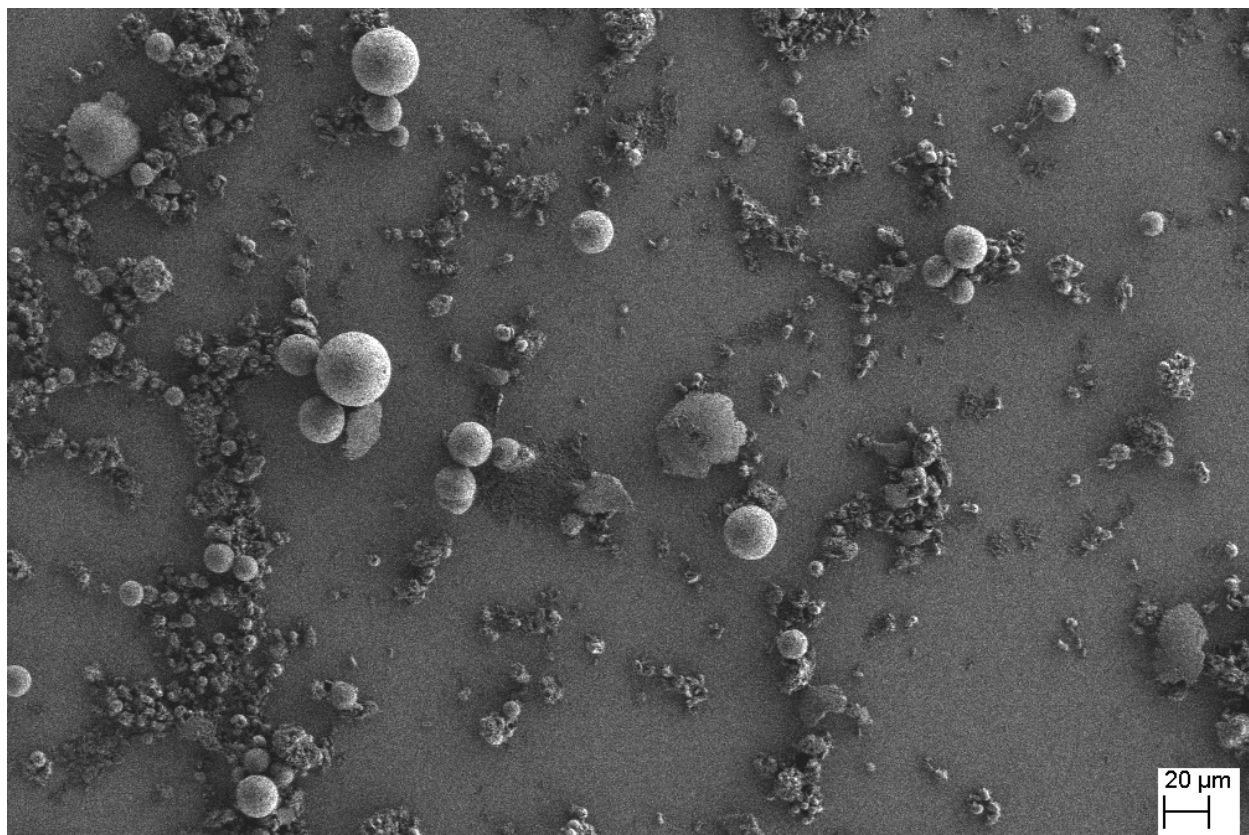

**Reference:**

1. X. D. Wang, Z.-X. Shen, T. Sang, X.-B. Cheng, M.-F. Li, L.-Y. Chen, Z.-S. Wang, *J. Colloid Interface Sci.*, 2010, **341**, 23.
